# Supplementary material for: Self-healing of thermally molded commodity plastics based on heat-resistant and anti-aging healing systems
Source: Royal Society of Chemistry journal article supplement (doi:10.1039/c6ra18485e), 2016-01-01
Supplement: c6ra18485e1.pdf [file c6ra18485e1.pdf]

Electronic Supplementary Information

**Self-healing of thermally molded commodity plastics based on heat-resistant and anti-aging healing systems**

Guang Sheng Cao,<sup>a</sup> Min Zhi Rong,<sup>\*b</sup> Ming Qiu Zhang<sup>\*b</sup>, Xiao Ji Ye<sup>c</sup>

<sup>a</sup>Key Laboratory for Polymeric Composite and Functional Materials of Ministry of Education, GD HPPC Lab, School of Chemistry and Chemical Engineering, Sun Yat-sen University, Guangzhou 510275, P. R. China

<sup>b</sup>Materials Science Institute, Sun Yat-sen University, Guangzhou 510275, P. R. China

<sup>c</sup>Guangdong Provincial Public Laboratory of Analysis and Testing Technology, China National Analytical Center, Guangzhou 510070, P. R. China

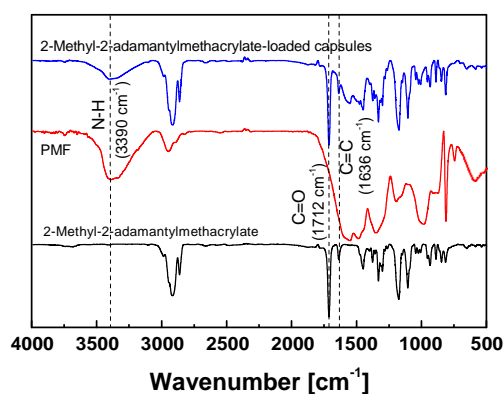

(a)

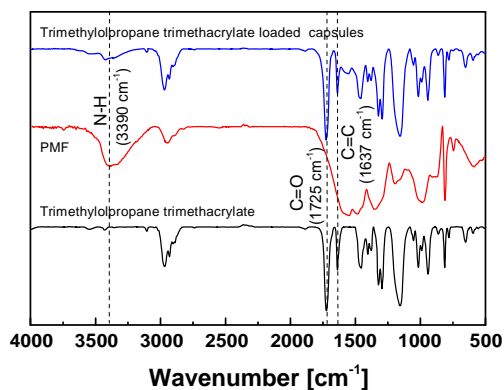

(b)

**Fig. S1** (a) FTIR spectrum of 2-methyl-2-adamantylmethacrylate-loaded

microcapsules in comparison with those of PMF shell and pure 2-methyl-2-adamantylmethacrylate. (b) FTIR spectrum of trimethylolpropane trimethacrylate-loaded microcapsules in comparison with those of PMF shell and pure trimethylolpropane trimethacrylate.

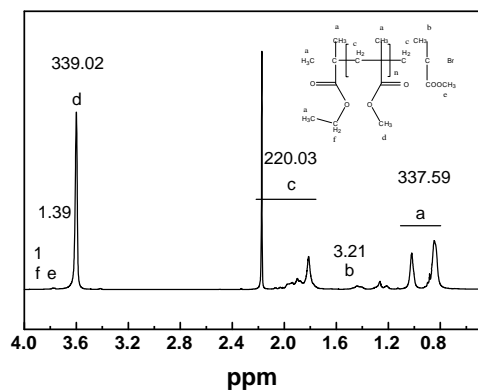

(a)

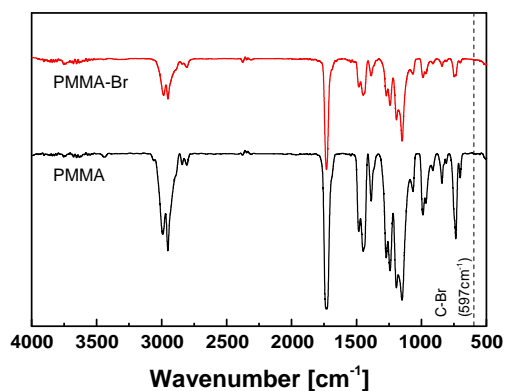

(b)

**Fig. S2** (a) <sup>1</sup>H NMR and (b) FTIR spectra of the macroinitiator PMMA-Br. The numerals shown in (a) are the integrations of the peaks.

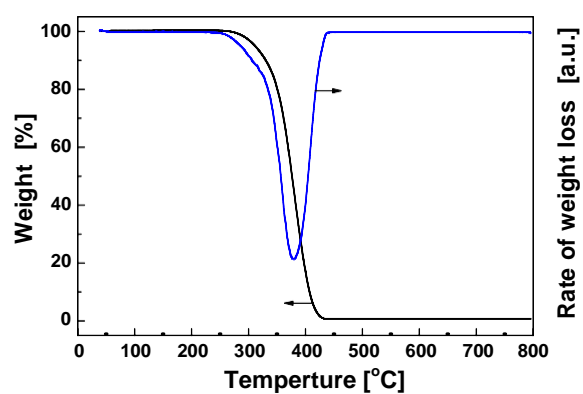

**Fig. S3** Thermal decomposition behavior of the macroinitiator PMMA-Br.

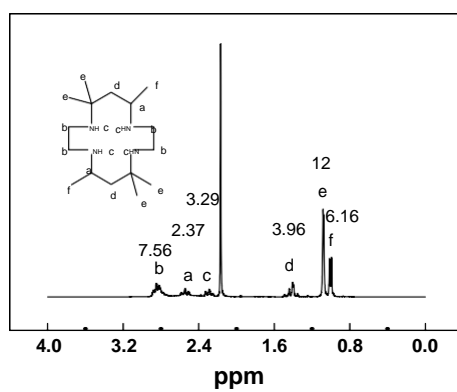

(a)

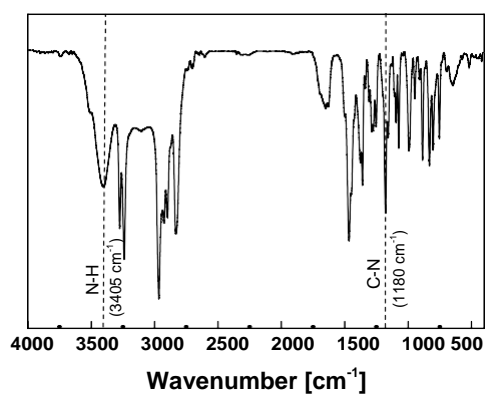

(b)

**Fig. S4** (a) <sup>1</sup>H NMR and (b) FTIR spectra of the ligand Me<sub>6</sub>[14]aneN<sub>4</sub>. The numerals shown in (a) are the integrations of the peaks.

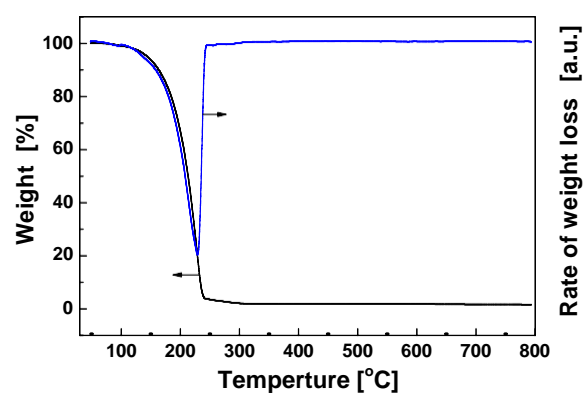

**Fig. S5** Thermal decomposition behavior of the ligand Me<sub>6</sub>[14]aneN<sub>4</sub>.

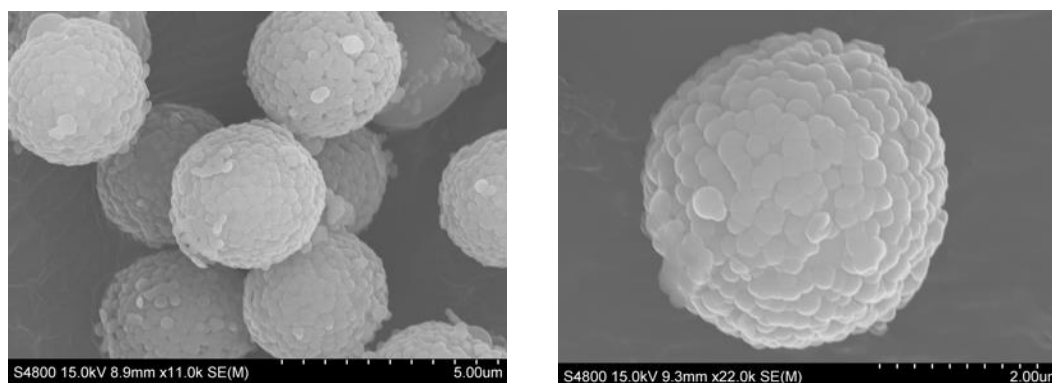

**Fig. S6** Scanning electron microscopic (SEM) photos of SiO<sub>2</sub> coated PS-MMA particles carrying the coordination compound of Me<sub>6</sub>[14]aneN<sub>4</sub> and CuBr.

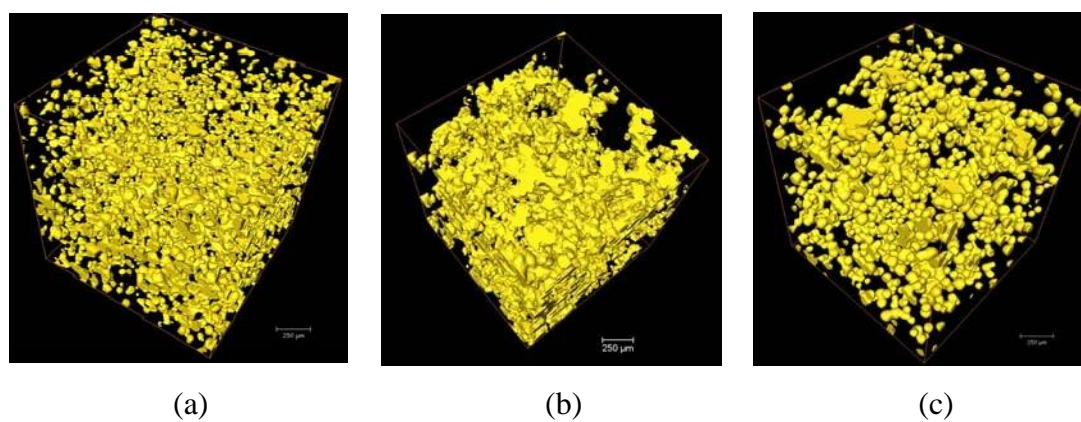

**Fig. S7** 3D distribution of healing capsules in (a) PS, (b) PMMA and (c) ABS based composites. Content of 2-methyl-2-adamantylmethacrylate-loaded microcapsules in

PS composite: 15 wt%. Contents of trimethylolpropane trimethacrylate-loaded microcapsules in PMMA and ABS composites: 15 wt%.

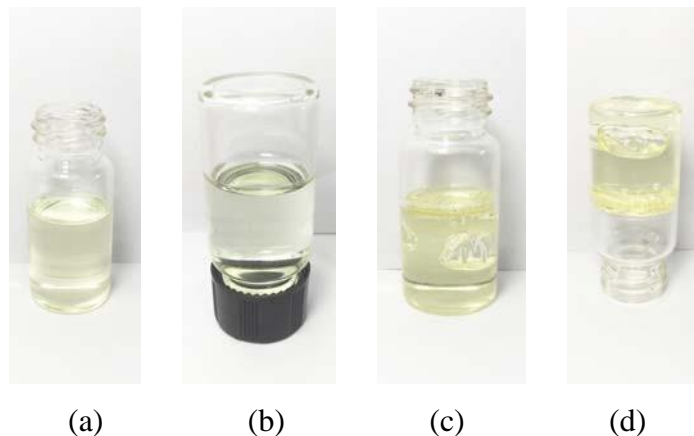

**Fig. S8** Photos of trimethylolpropane trimethacrylate (a, b) in liquid state at room temperature and (c, d) in solid state after being heated to 170 °C for 45 min in the presence of air. The results demonstrate that auto-polymerization must have taken place.

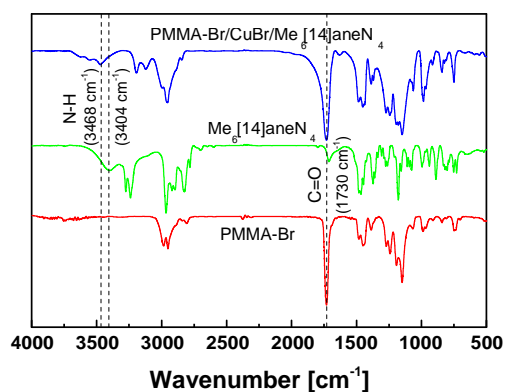

**Fig. S9** FTIR spectrum of PMMA-Br particles carrying the coordination compound of the ligand and cuprous bromide in comparison with those of the ligand and PMMA-Br.

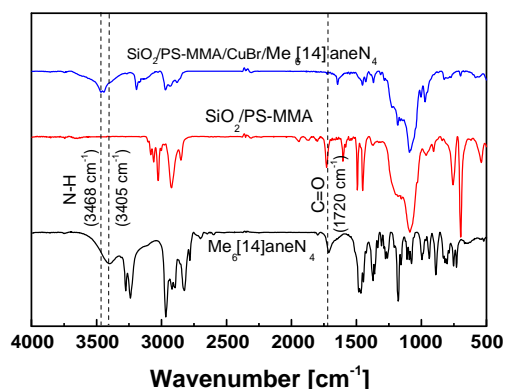

**Fig. S10** FTIR spectrum of silicon dioxide coated PS-MMA microparticles carrying the coordination compound of  $\text{Me}_6[14]\text{aneN}_4$  and cuprous bromide in comparison with those of the ligand and silicon dioxide coated PS-MMA microparticles.

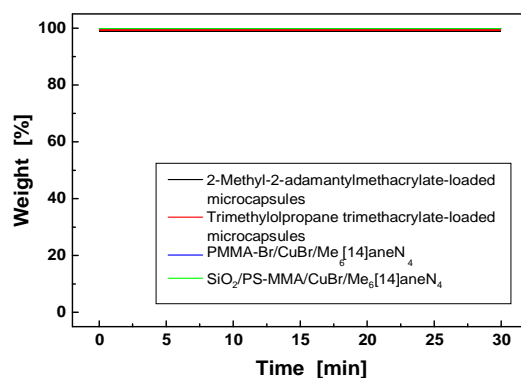

**Fig. S11** Time dependences of weight of 2-methyl-2-adamantylmethacrylate-loaded microcapsules, trimethylolpropane trimethacrylate-loaded microcapsules, PMMA-Br particles carrying the coordination compound of  $\text{Me}_6[14]\text{aneN}_4$  and cuprous bromide, and silicon dioxide coated PS-MMA microparticles carrying the coordination compound of  $\text{Me}_6[14]\text{aneN}_4$  and cuprous bromide. Testing atmosphere: oxygen. Heating rate: 10  $^{\circ}\text{C}/\text{min}$ .
